# Supplementary material
Source: Springer Nature journal article supplement (https://www.springermedizin.de/resource/supplementary/12905_2011_233_MOESM3_ESM.pdf/9518256)
Supplement: MOESM3 [file 9518256]

### **Inclusion criteria:**

- The patient has at least a POPQ stage II descent of the anterior compartment
- The patient is scheduled for colporrhaphia anterior alone or in combination with other POP surgery

### **Exclusion criteria:**

- Previous POP surgery
- If there is the intention to use mesh- materials
- Previous incontinence surgery or planned additional incontinence surgery (TVT,TOT etc)
- Contra indications for MR-imaging (e.g pace-maker, artificial valves, prosthesis).
